# Supplementary material
Source: publisher figshare collection journal article supplement (https://acs.figshare.com/ndownloader/files/3865918)
Supplement: Supplementary file 1 [file 3865918]

 
data_n0174b-1 
 
_audit_creation_method            SHELXL-97 
_chemical_name_systematic 
; 
 ? 
; 
_chemical_name_common             ? 
_chemical_melting_point           ? 
_chemical_formula_moiety          'C11 H15 N O2'  
_chemical_formula_sum 
 'C11 H15 N O2' 
_chemical_formula_weight          193.24 
_chemical_absolute_configuration  syn 
 
loop_ 
 _atom_type_symbol 
 _atom_type_description 
 _atom_type_scat_dispersion_real 
 _atom_type_scat_dispersion_imag 
 _atom_type_scat_source 
 'C'  'C'   0.0033   0.0016 
 'International Tables Vol C Tables 4.2.6.8 and 6.1.1.4' 
 'H'  'H'   0.0000   0.0000 
 'International Tables Vol C Tables 4.2.6.8 and 6.1.1.4' 
 'N'  'N'   0.0061   0.0033 
 'International Tables Vol C Tables 4.2.6.8 and 6.1.1.4' 
 'O'  'O'   0.0106   0.0060 
 'International Tables Vol C Tables 4.2.6.8 and 6.1.1.4' 
 
_symmetry_cell_setting            Monoclinic 
_symmetry_space_group_name_H-M    P2(1)
 
loop_ 
 _symmetry_equiv_pos_as_xyz 
 'x, y, z' 
 '-x, y+1/2, -z' 
 
_cell_length_a                    5.8577(3) 
_cell_length_b                    6.6735(3) 
_cell_length_c                    12.7807(6) 
_cell_angle_alpha                 90.00 
_cell_angle_beta                  98.084(3) 
_cell_angle_gamma                 90.00 
_cell_volume                      494.65(4) 
_cell_formula_units_Z             2 
_cell_measurement_temperature     130(2) 
_cell_measurement_reflns_used     17353
_cell_measurement_theta_min       3.22 
_cell_measurement_theta_max       29.90 
 
_exptl_crystal_description        'platy' 
_exptl_crystal_colour             'White' 
_exptl_crystal_size_max           0.06 
_exptl_crystal_size_mid           0.04 
_exptl_crystal_size_min           0.02 
_exptl_crystal_density_meas       'not measured'
_exptl_crystal_density_diffrn     1.297 
_exptl_crystal_density_method     'not measured' 
_exptl_crystal_F_000              208 
_exptl_absorpt_coefficient_mu     0.089 
_exptl_absorpt_correction_type    'multi-scan'
_exptl_absorpt_correction_T_min   0.9947 
_exptl_absorpt_correction_T_max   0.9982 
_exptl_absorpt_process_details    'SADABS'
 
_exptl_special_details 
; 
 ? 
; 
 
_diffrn_ambient_temperature       130(2) 
_diffrn_radiation_wavelength      0.71073 
_diffrn_radiation_type            MoK\a 
_diffrn_radiation_source          'fine-focus sealed tube' 
_diffrn_radiation_monochromator   graphite 
_diffrn_measurement_device_type   'Photon 100 CMOS detector' 
_diffrn_measurement_method        'phi and omega scans'
_diffrn_detector_area_resol_mean  ? 
_diffrn_reflns_number             17353 
_diffrn_reflns_av_R_equivalents   0.0633 
_diffrn_reflns_av_sigmaI/netI     0.0456 
_diffrn_reflns_limit_h_min        -8 
_diffrn_reflns_limit_h_max        8 
_diffrn_reflns_limit_k_min        -9 
_diffrn_reflns_limit_k_max        9 
_diffrn_reflns_limit_l_min        -17 
_diffrn_reflns_limit_l_max        17 
_diffrn_reflns_theta_min          3.22 
_diffrn_reflns_theta_max          29.90 
_reflns_number_total              2853 
_reflns_number_gt                 2314 
_reflns_threshold_expression      >2sigma(I) 
 
_computing_data_collection        'Bruker SMART' 
_computing_cell_refinement        'Bruker SMART'
_computing_data_reduction         'Bruker SAINT'
_computing_structure_solution     'SHELXS-97 (Sheldrick, 2008)' 
_computing_structure_refinement   'SHELXL-97 (Sheldrick, 2008)' 
_computing_molecular_graphics     'Bruker SHELXTL' 
_computing_publication_material   'Bruker SHELXTL' 
 
_refine_special_details 
; 
 Refinement of F^2^ against ALL reflections.  The weighted R-factor wR and 
 goodness of fit S are based on F^2^, conventional R-factors R are based 
 on F, with F set to zero for negative F^2^. The threshold expression of 
 F^2^ > 2sigma(F^2^) is used only for calculating R-factors(gt) etc. and is 
 not relevant to the choice of reflections for refinement.  R-factors based 
 on F^2^ are statistically about twice as large as those based on F, and R- 
 factors based on ALL data will be even larger. 
; 
 
_refine_ls_structure_factor_coef  Fsqd  
_refine_ls_matrix_type            full 
_refine_ls_weighting_scheme       calc  
_refine_ls_weighting_details 
 'calc w=1/[\s^2^(Fo^2^)+(0.0526P)^2^+0.0326P] where P=(Fo^2^+2Fc^2^)/3' 
_atom_sites_solution_primary      direct 
_atom_sites_solution_secondary    difmap 
_atom_sites_solution_hydrogens    geom 
_refine_ls_hydrogen_treatment     mixed 
_refine_ls_extinction_method      none 
_refine_ls_extinction_coef        ? 
_refine_ls_number_reflns          2853 
_refine_ls_number_parameters      136 
_refine_ls_number_restraints      1 
_refine_ls_R_factor_all           0.0635 
_refine_ls_R_factor_gt            0.0432 
_refine_ls_wR_factor_ref          0.1015 
_refine_ls_wR_factor_gt           0.0941 
_refine_ls_goodness_of_fit_ref    1.081 
_refine_ls_restrained_S_all       1.081 
_refine_ls_shift/su_max           0.000 
_refine_ls_shift/su_mean          0.000 
 
loop_ 
 _atom_site_label 
 _atom_site_type_symbol 
 _atom_site_fract_x 
 _atom_site_fract_y 
 _atom_site_fract_z 
 _atom_site_U_iso_or_equiv 
 _atom_site_adp_type 
 _atom_site_occupancy 
 _atom_site_symmetry_multiplicity 
 _atom_site_calc_flag 
 _atom_site_refinement_flags 
 _atom_site_disorder_assembly 
 _atom_site_disorder_group 
O1 O 0.3303(2) -0.06768(16) 0.93884(9) 0.0234(3) Uani 1 1 d . . . 
O2 O 0.3195(2) 0.52961(17) 0.90536(8) 0.0234(3) Uani 1 1 d . . . 
N1 N -0.0822(2) -0.0318(2) 0.79150(11) 0.0277(3) Uani 1 1 d . . . 
C1 C 0.0449(3) -0.0168(2) 0.70871(12) 0.0188(3) Uani 1 1 d . . . 
C2 C -0.0250(3) -0.1240(2) 0.61547(13) 0.0257(4) Uani 1 1 d . . . 
H2B H -0.1664 -0.1959 0.6077 0.031 Uiso 1 1 calc R . . 
C3 C 0.1081(3) -0.1264(3) 0.53503(13) 0.0291(4) Uani 1 1 d . . . 
H3A H 0.0575 -0.1982 0.4718 0.035 Uiso 1 1 calc R . . 
C4 C 0.3157(3) -0.0244(2) 0.54602(12) 0.0264(4) Uani 1 1 d . . . 
H4A H 0.4098 -0.0284 0.4913 0.032 Uiso 1 1 calc R . . 
C5 C 0.3853(3) 0.0836(2) 0.63756(12) 0.0210(3) Uani 1 1 d . . . 
H5A H 0.5281 0.1533 0.6447 0.025 Uiso 1 1 calc R . . 
C6 C 0.2521(2) 0.0929(2) 0.71926(11) 0.0160(3) Uani 1 1 d . . . 
C7 C 0.3279(2) 0.2140(2) 0.81878(12) 0.0141(3) Uani 1 1 d . . . 
H7A H 0.4993 0.2016 0.8352 0.017 Uiso 1 1 calc R . . 
C8 C 0.2249(3) 0.1223(2) 0.91175(11) 0.0168(3) Uani 1 1 d . . . 
H8A H 0.2559 0.2140 0.9740 0.020 Uiso 1 1 calc R . . 
C9 C -0.0317(3) 0.0946(2) 0.88410(12) 0.0217(3) Uani 1 1 d . . . 
H9A H -0.0944 0.0323 0.9444 0.026 Uiso 1 1 calc R . . 
H9B H -0.1067 0.2267 0.8701 0.026 Uiso 1 1 calc R . . 
C10 C 0.2719(2) 0.4381(2) 0.80331(11) 0.0156(3) Uani 1 1 d . . . 
H10A H 0.1042 0.4536 0.7762 0.019 Uiso 1 1 calc R . . 
C11 C 0.4120(3) 0.5389(3) 0.72757(13) 0.0277(4) Uani 1 1 d . . . 
H11A H 0.3692 0.6807 0.7206 0.042 Uiso 1 1 calc R . . 
H11B H 0.3812 0.4738 0.6583 0.042 Uiso 1 1 calc R . . 
H11C H 0.5765 0.5275 0.7548 0.042 Uiso 1 1 calc R . . 
H1A H 0.442(3) -0.051(4) 0.9901(15) 0.033 Uiso 1 1 d . . . 
H2A H 0.301(4) 0.653(4) 0.8993(16) 0.033 Uiso 1 1 d . . . 
H1B H -0.215(4) -0.078(4) 0.7769(15) 0.033 Uiso 1 1 d . . . 
 
loop_ 
 _atom_site_aniso_label 
 _atom_site_aniso_U_11 
 _atom_site_aniso_U_22 
 _atom_site_aniso_U_33 
 _atom_site_aniso_U_23 
 _atom_site_aniso_U_13 
 _atom_site_aniso_U_12 
O1 0.0329(7) 0.0115(5) 0.0225(6) 0.0023(4) -0.0074(5) 0.0014(5) 
O2 0.0394(7) 0.0093(5) 0.0192(5) -0.0022(4) -0.0037(5) 0.0004(5) 
N1 0.0203(7) 0.0384(9) 0.0241(7) -0.0049(6) 0.0025(6) -0.0115(6) 
C1 0.0213(8) 0.0164(8) 0.0177(7) 0.0013(5) -0.0010(6) 0.0016(6) 
C2 0.0278(9) 0.0209(8) 0.0254(8) -0.0021(6) -0.0059(7) -0.0020(7) 
C3 0.0441(10) 0.0207(8) 0.0195(7) -0.0043(6) -0.0055(7) 0.0053(7) 
C4 0.0407(10) 0.0220(9) 0.0178(7) 0.0003(6) 0.0090(7) 0.0092(7) 
C5 0.0242(8) 0.0161(7) 0.0235(7) 0.0020(6) 0.0063(6) 0.0030(6) 
C6 0.0194(8) 0.0124(6) 0.0156(6) 0.0004(6) -0.0003(5) 0.0023(6) 
C7 0.0123(7) 0.0121(6) 0.0174(7) -0.0015(5) 0.0009(5) -0.0002(5) 
C8 0.0259(8) 0.0102(7) 0.0138(7) 0.0000(5) 0.0010(6) 0.0005(6) 
C9 0.0235(8) 0.0225(8) 0.0203(7) 0.0016(6) 0.0072(6) -0.0020(7) 
C10 0.0169(7) 0.0140(6) 0.0151(6) -0.0008(5) -0.0003(5) 0.0012(6) 
C11 0.0366(10) 0.0164(8) 0.0326(9) 0.0041(7) 0.0131(7) 0.0013(7) 
 
_geom_special_details 
; 
 All esds (except the esd in the dihedral angle between two l.s. planes) 
 are estimated using the full covariance matrix.  The cell esds are taken 
 into account individually in the estimation of esds in distances, angles 
 and torsion angles; correlations between esds in cell parameters are only 
 used when they are defined by crystal symmetry.  An approximate (isotropic) 
 treatment of cell esds is used for estimating esds involving l.s. planes. 
; 
 
loop_ 
 _geom_bond_atom_site_label_1 
 _geom_bond_atom_site_label_2 
 _geom_bond_distance 
 _geom_bond_site_symmetry_2 
 _geom_bond_publ_flag 
O1 C8 1.4313(17) . ? 
O2 C10 1.4317(17) . ? 
N1 C1 1.380(2) . ? 
N1 C9 1.449(2) . ? 
C1 C2 1.401(2) . ? 
C1 C6 1.407(2) . ? 
C2 C3 1.375(3) . ? 
C3 C4 1.383(3) . ? 
C4 C5 1.386(2) . ? 
C5 C6 1.390(2) . ? 
C6 C7 1.5198(19) . ? 
C7 C8 1.534(2) . ? 
C7 C10 1.537(2) . ? 
C8 C9 1.507(2) . ? 
C10 C11 1.512(2) . ? 
 
loop_ 
 _geom_angle_atom_site_label_1 
 _geom_angle_atom_site_label_2 
 _geom_angle_atom_site_label_3 
 _geom_angle 
 _geom_angle_site_symmetry_1 
 _geom_angle_site_symmetry_3 
 _geom_angle_publ_flag 
C1 N1 C9 120.93(13) . . ? 
N1 C1 C2 119.38(14) . . ? 
N1 C1 C6 120.99(13) . . ? 
C2 C1 C6 119.48(14) . . ? 
C3 C2 C1 120.89(16) . . ? 
C2 C3 C4 120.07(15) . . ? 
C3 C4 C5 119.45(15) . . ? 
C4 C5 C6 121.85(15) . . ? 
C5 C6 C1 118.20(13) . . ? 
C5 C6 C7 121.57(13) . . ? 
C1 C6 C7 120.23(12) . . ? 
C6 C7 C8 109.62(11) . . ? 
C6 C7 C10 112.19(12) . . ? 
C8 C7 C10 112.81(12) . . ? 
O1 C8 C9 109.27(12) . . ? 
O1 C8 C7 109.74(12) . . ? 
C9 C8 C7 110.82(12) . . ? 
N1 C9 C8 110.19(12) . . ? 
O2 C10 C11 109.85(13) . . ? 
O2 C10 C7 106.69(12) . . ? 
C11 C10 C7 112.95(13) . . ? 
 
loop_ 
 _geom_hbond_atom_site_label_D 
 _geom_hbond_atom_site_label_H 
 _geom_hbond_atom_site_label_A 
 _geom_hbond_distance_DH 
 _geom_hbond_distance_HA 
 _geom_hbond_distance_DA 
 _geom_hbond_angle_DHA 
 _geom_hbond_site_symmetry_A 
O2 H2A O1  0.83(2) 1.93(2) 2.7207(16) 158(2) 1_565 
O1 H1A O2  0.86(2) 1.87(2) 2.7288(16) 171(2) 2_647 
 
_diffrn_measured_fraction_theta_max    0.999 
_diffrn_reflns_theta_full              29.90 
_diffrn_measured_fraction_theta_full   0.999 
_refine_diff_density_max    0.334 
_refine_diff_density_min   -0.242 
_refine_diff_density_rms    0.063 
